# Supplementary material
Source: PubMed Central journal article supplement (PMC6372112)
Supplement: NIHMS1004425-supplement-Supplemental_Table_and_Figures.pdf [file NIHMS1004425-supplement-Supplemental_Table_and_Figures.pdf]

**Supplementary Table S1. Recombinant RTA peptic peptides**

| Peptide number (Pep#) and RTA amino acid residues start/end |       |     |       |       |     |       |       |     |       |       |     |
|-------------------------------------------------------------|-------|-----|-------|-------|-----|-------|-------|-----|-------|-------|-----|
| Pep #                                                       | start | end | Pep # | start | end | Pep # | start | end | Pep # | start | end |
| 1                                                           | 0     | 11  | 36    | 92    | 103 | 71    | 162   | 168 | 106   | 217   | 232 |
| 2                                                           | 12    | 20  | 37    | 92    | 107 | 72    | 165   | 168 | 107   | 217   | 240 |
| 3                                                           | 12    | 24  | 38    | 93    | 99  | 73    | 165   | 171 | 108   | 218   | 225 |
| 4                                                           | 21    | 24  | 39    | 93    | 107 | 74    | 168   | 171 | 109   | 218   | 232 |
| 5                                                           | 25    | 32  | 40    | 102   | 107 | 75    | 169   | 173 | 110   | 220   | 232 |
| 6                                                           | 25    | 37  | 41    | 103   | 107 | 76    | 172   | 181 | 111   | 221   | 232 |
| 7                                                           | 28    | 37  | 42    | 104   | 107 | 77    | 175   | 181 | 112   | 226   | 232 |
| 8                                                           | 33    | 59  | 43    | 104   | 109 | 78    | 178   | 181 | 113   | 226   | 240 |
| 9                                                           | 37    | 59  | 44    | 108   | 117 | 79    | 182   | 186 | 114   | 227   | 240 |
| 10                                                          | 38    | 45  | 45    | 108   | 118 | 80    | 182   | 187 | 115   | 232   | 240 |
| 11                                                          | 38    | 55  | 46    | 108   | 122 | 81    | 182   | 188 | 116   | 232   | 243 |
| 12                                                          | 38    | 57  | 47    | 118   | 122 | 82    | 182   | 190 | 117   | 232   | 248 |
| 13                                                          | 38    | 59  | 48    | 119   | 126 | 83    | 182   | 204 | 118   | 233   | 243 |
| 14                                                          | 56    | 59  | 49    | 123   | 126 | 84    | 187   | 204 | 119   | 233   | 244 |
| 15                                                          | 58    | 61  | 50    | 123   | 129 | 85    | 188   | 204 | 120   | 233   | 246 |
| 16                                                          | 58    | 68  | 51    | 123   | 133 | 86    | 189   | 204 | 121   | 233   | 248 |
| 17                                                          | 60    | 68  | 52    | 123   | 135 | 87    | 189   | 206 | 122   | 240   | 243 |
| 18                                                          | 60    | 69  | 53    | 127   | 133 | 88    | 191   | 204 | 123   | 241   | 244 |
| 19                                                          | 62    | 68  | 54    | 127   | 135 | 89    | 191   | 207 | 124   | 241   | 246 |
| 20                                                          | 69    | 72  | 55    | 130   | 135 | 90    | 195   | 204 | 125   | 241   | 248 |
| 21                                                          | 69    | 73  | 56    | 130   | 151 | 91    | 205   | 210 | 126   | 243   | 248 |
| 22                                                          | 69    | 74  | 57    | 133   | 144 | 92    | 205   | 214 | 127   | 244   | 248 |
| 23                                                          | 70    | 74  | 58    | 134   | 146 | 93    | 205   | 216 | 128   | 245   | 248 |
| 24                                                          | 72    | 79  | 59    | 134   | 151 | 94    | 205   | 217 | 129   | 247   | 253 |
| 25                                                          | 72    | 91  | 60    | 136   | 146 | 95    | 207   | 214 | 130   | 247   | 254 |
| 26                                                          | 73    | 79  | 61    | 136   | 147 | 96    | 207   | 216 | 131   | 247   | 255 |
| 27                                                          | 73    | 91  | 62    | 136   | 151 | 97    | 207   | 217 | 132   | 249   | 253 |
| 28                                                          | 75    | 79  | 63    | 146   | 150 | 98    | 208   | 214 | 133   | 249   | 254 |
| 29                                                          | 75    | 91  | 64    | 147   | 150 | 99    | 208   | 216 | 134   | 249   | 255 |
| 30                                                          | 80    | 91  | 65    | 147   | 151 | 100   | 208   | 217 | 135   | 255   | 267 |
| 31                                                          | 80    | 92  | 66    | 148   | 151 | 101   | 211   | 216 | 136   | 256   | 267 |
| 32                                                          | 84    | 91  | 67    | 152   | 161 | 102   | 211   | 217 | 137   | 257   | 267 |
| 33                                                          | 92    | 99  | 68    | 152   | 164 | 103   | 212   | 216 | 138   | 258   | 267 |
| 34                                                          | 92    | 101 | 69    | 153   | 164 | 104   | 217   | 220 |       |       |     |
| 35                                                          | 92    | 102 | 70    | 162   | 167 | 105   | 217   | 225 |       |       |     |

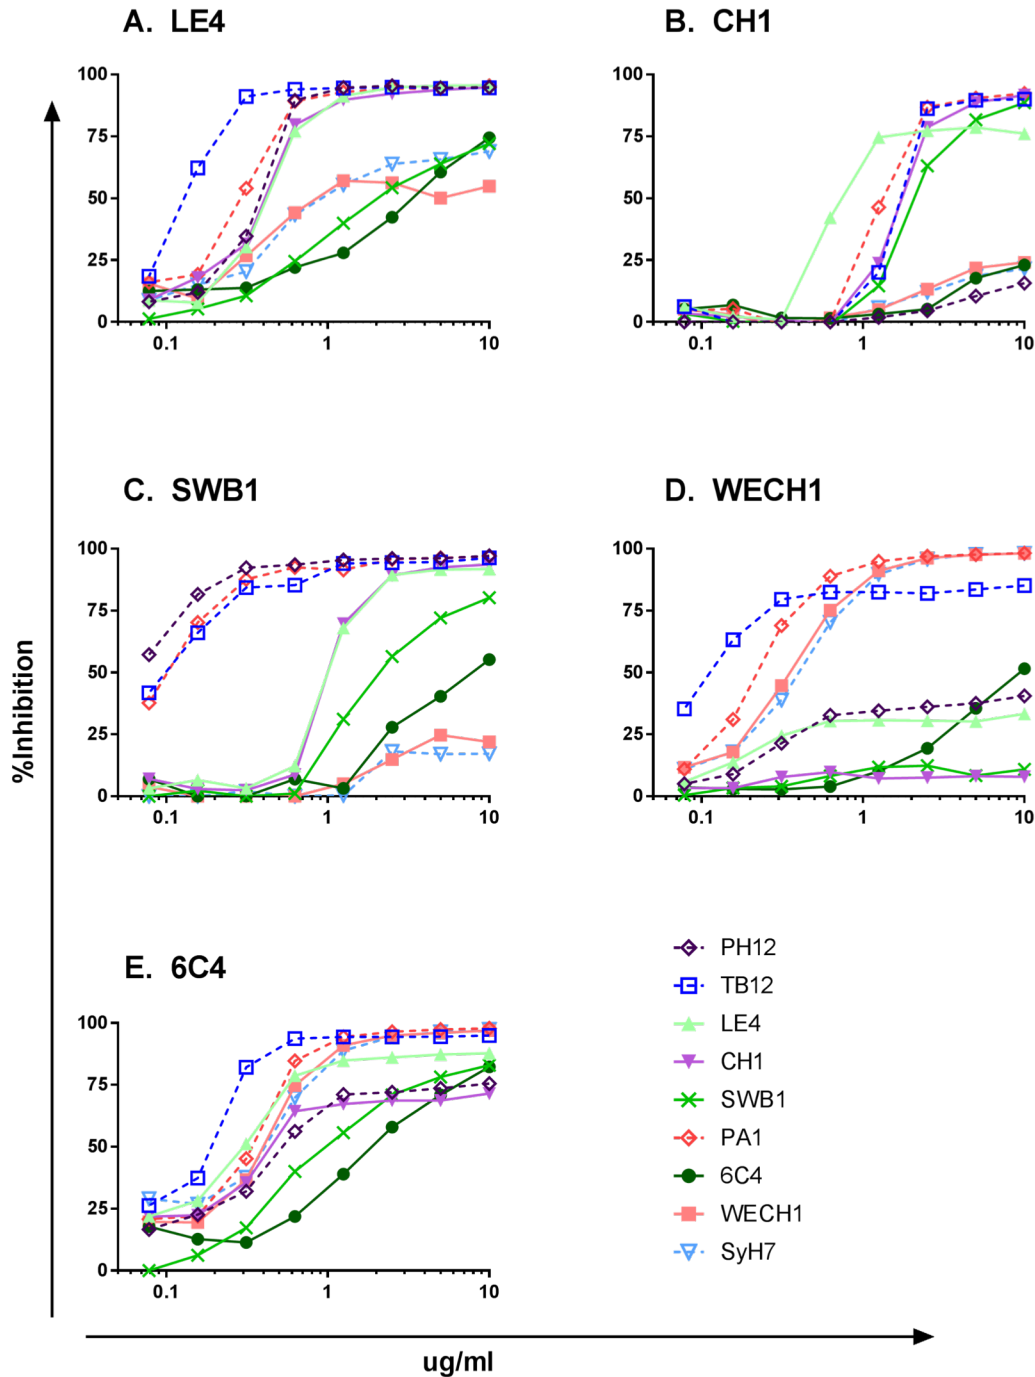

**Figure S1. Epitope mapping by competition ELISA.** Competition capture ELISAs in which microtiter plates were coated with the mAbs indicated in panels A-E and then challenged with soluble biotinylated in the presence of serial two-fold dilutions of competitor mAbs ( $\mu\text{g/ml}$ ). The degree to which the competitor mAb prevented of capture of biotinylated-ricin is indicated as % inhibition (y-axis).

## A. LE4

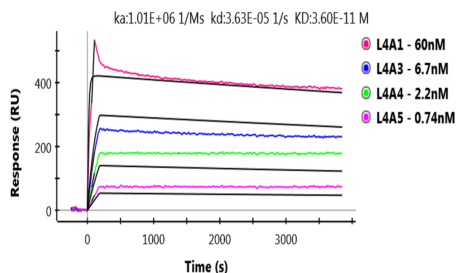

## B. CH1

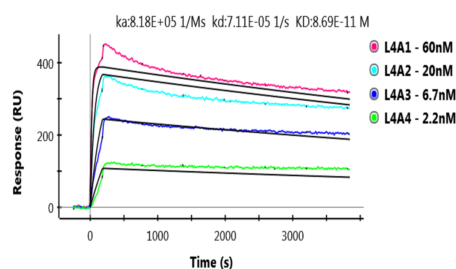

## C. SWB1

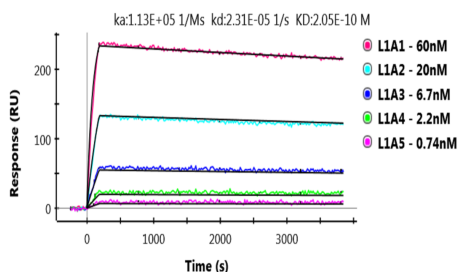

## D. 6C4

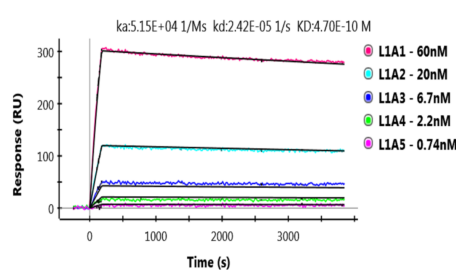

## E. WECH1

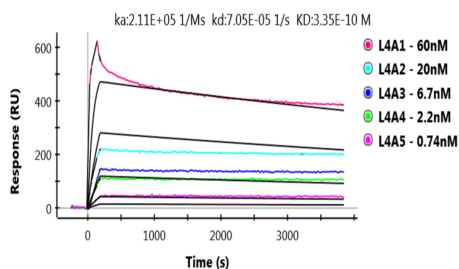

**Figure S2. Kinetics of Ricin binding by RTA mAbs. (Panels A-E)** Sensorgrams from SPR analysis in which Ricin-coated chips (4 $\mu$ g/ml) were probed with indicated mAbs. The real-time binding was recorded as response units (RU) versus time. Binding was determined over a range of mAbs concentrations (nM); 60 (red), 20 (light blue), 6.7 (blue), 2.2 (green), and 0.74 (purple). The curves were fit using the Langmuir binding model with the ProteOn Manager software 3.1.0. (BioRad, Inc.)
